# Supplementary material
Source: PubMed Central journal article supplement (PMC3079379)

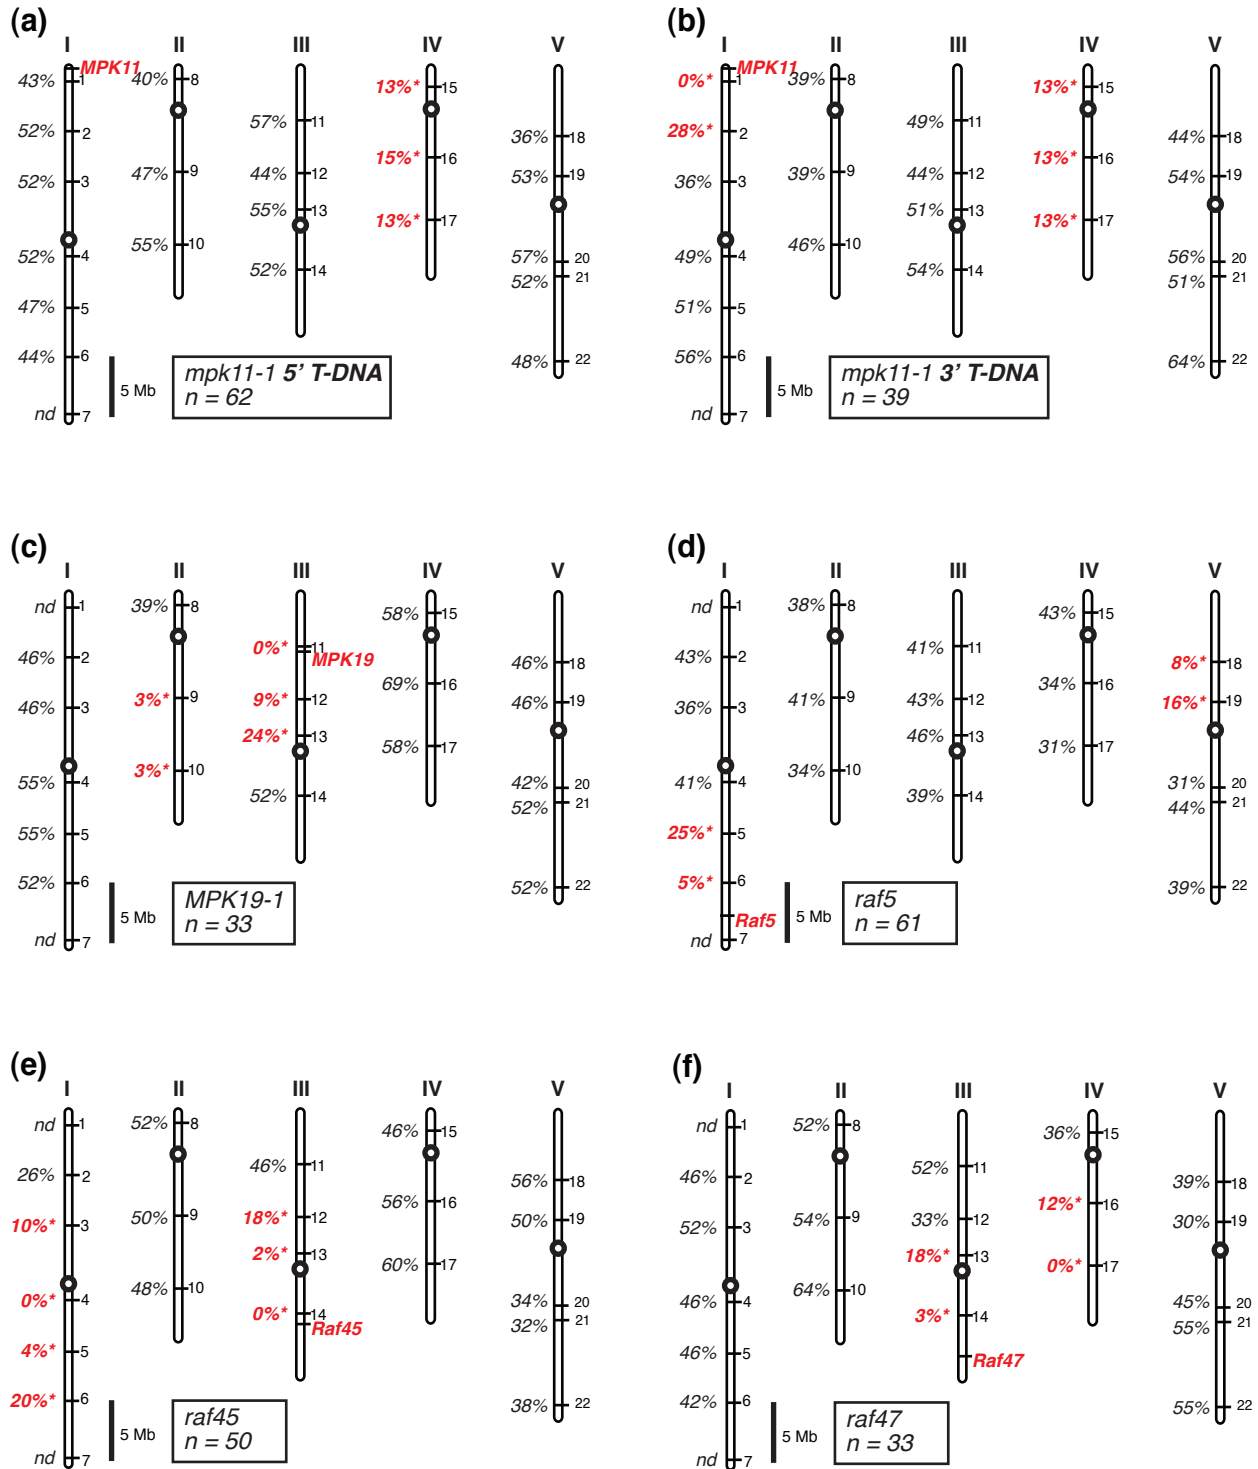

Figure S1

Supplement: NIHMS267864-supplement-Supplementary_Figure_1.pdf [file NIHMS267864-supplement-Supplementary_Figure_1.pdf]

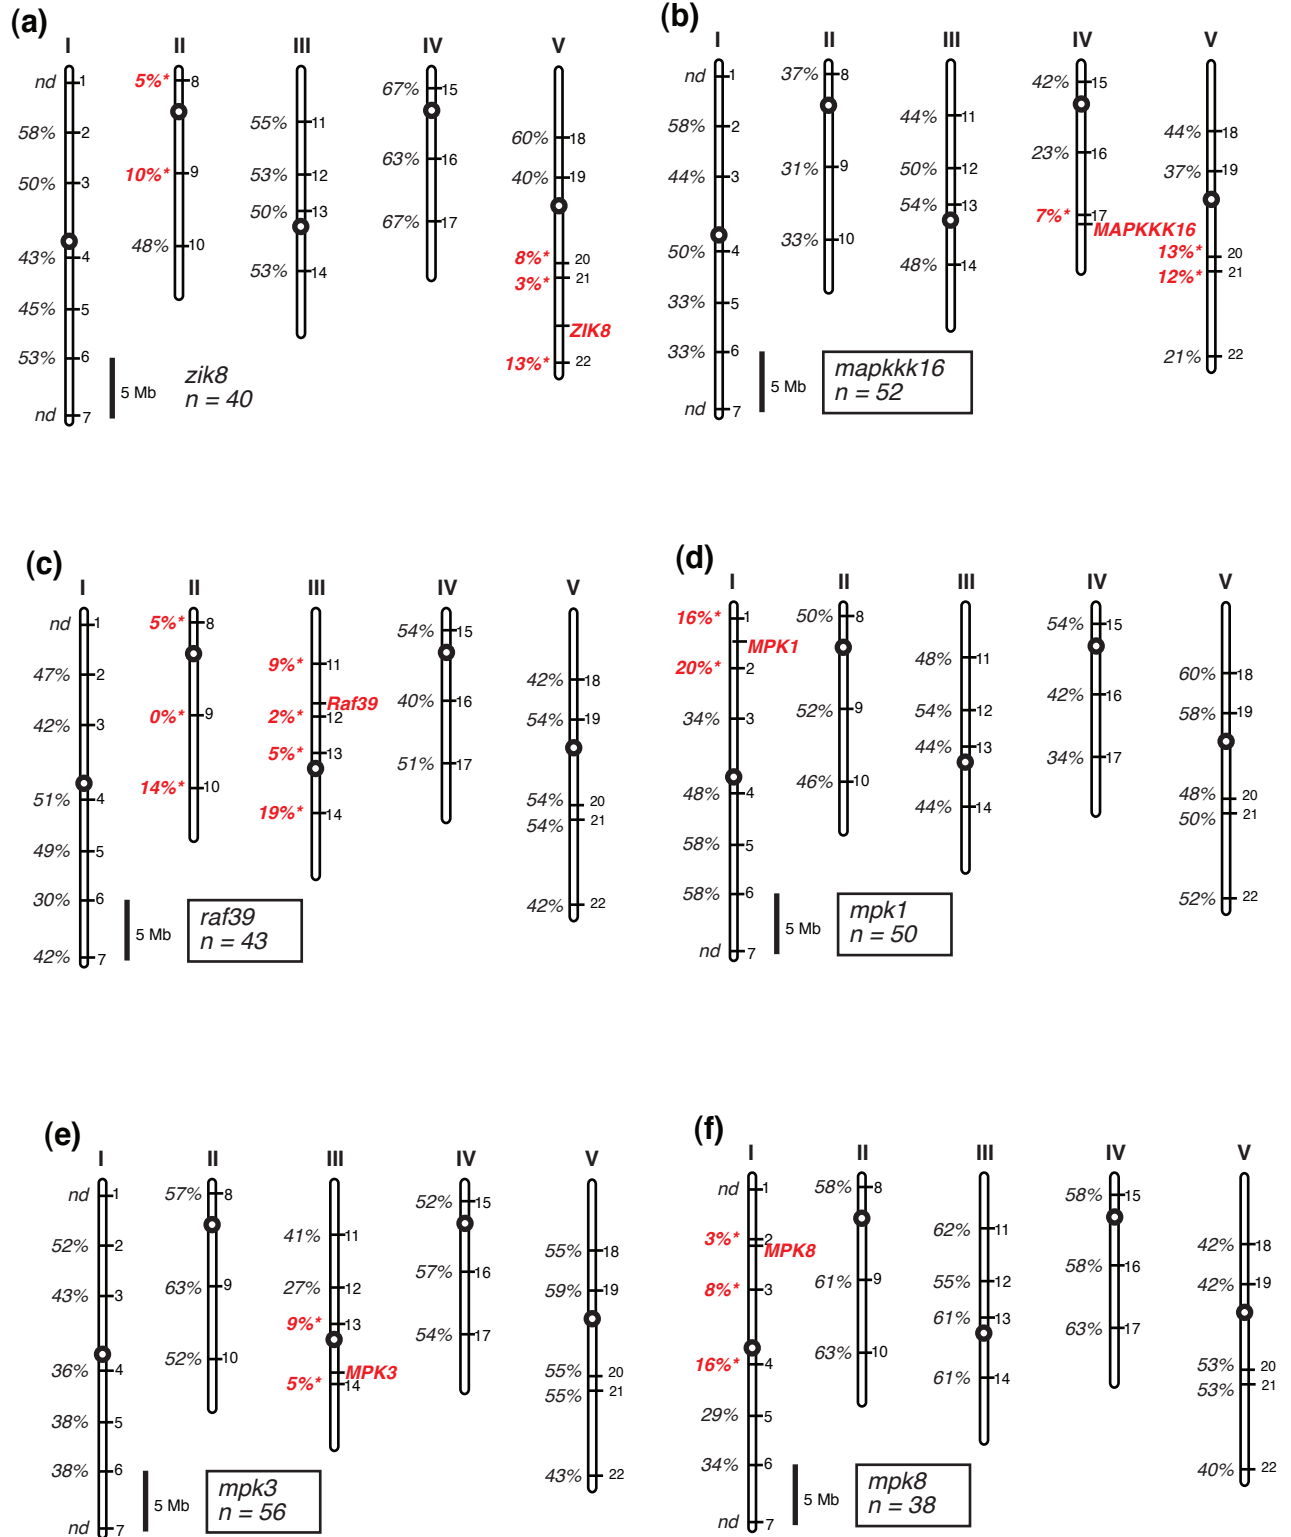

Figure S2

Supplement: NIHMS267864-supplement-Supplementary_Figure_2.pdf [file NIHMS267864-supplement-Supplementary_Figure_2.pdf]

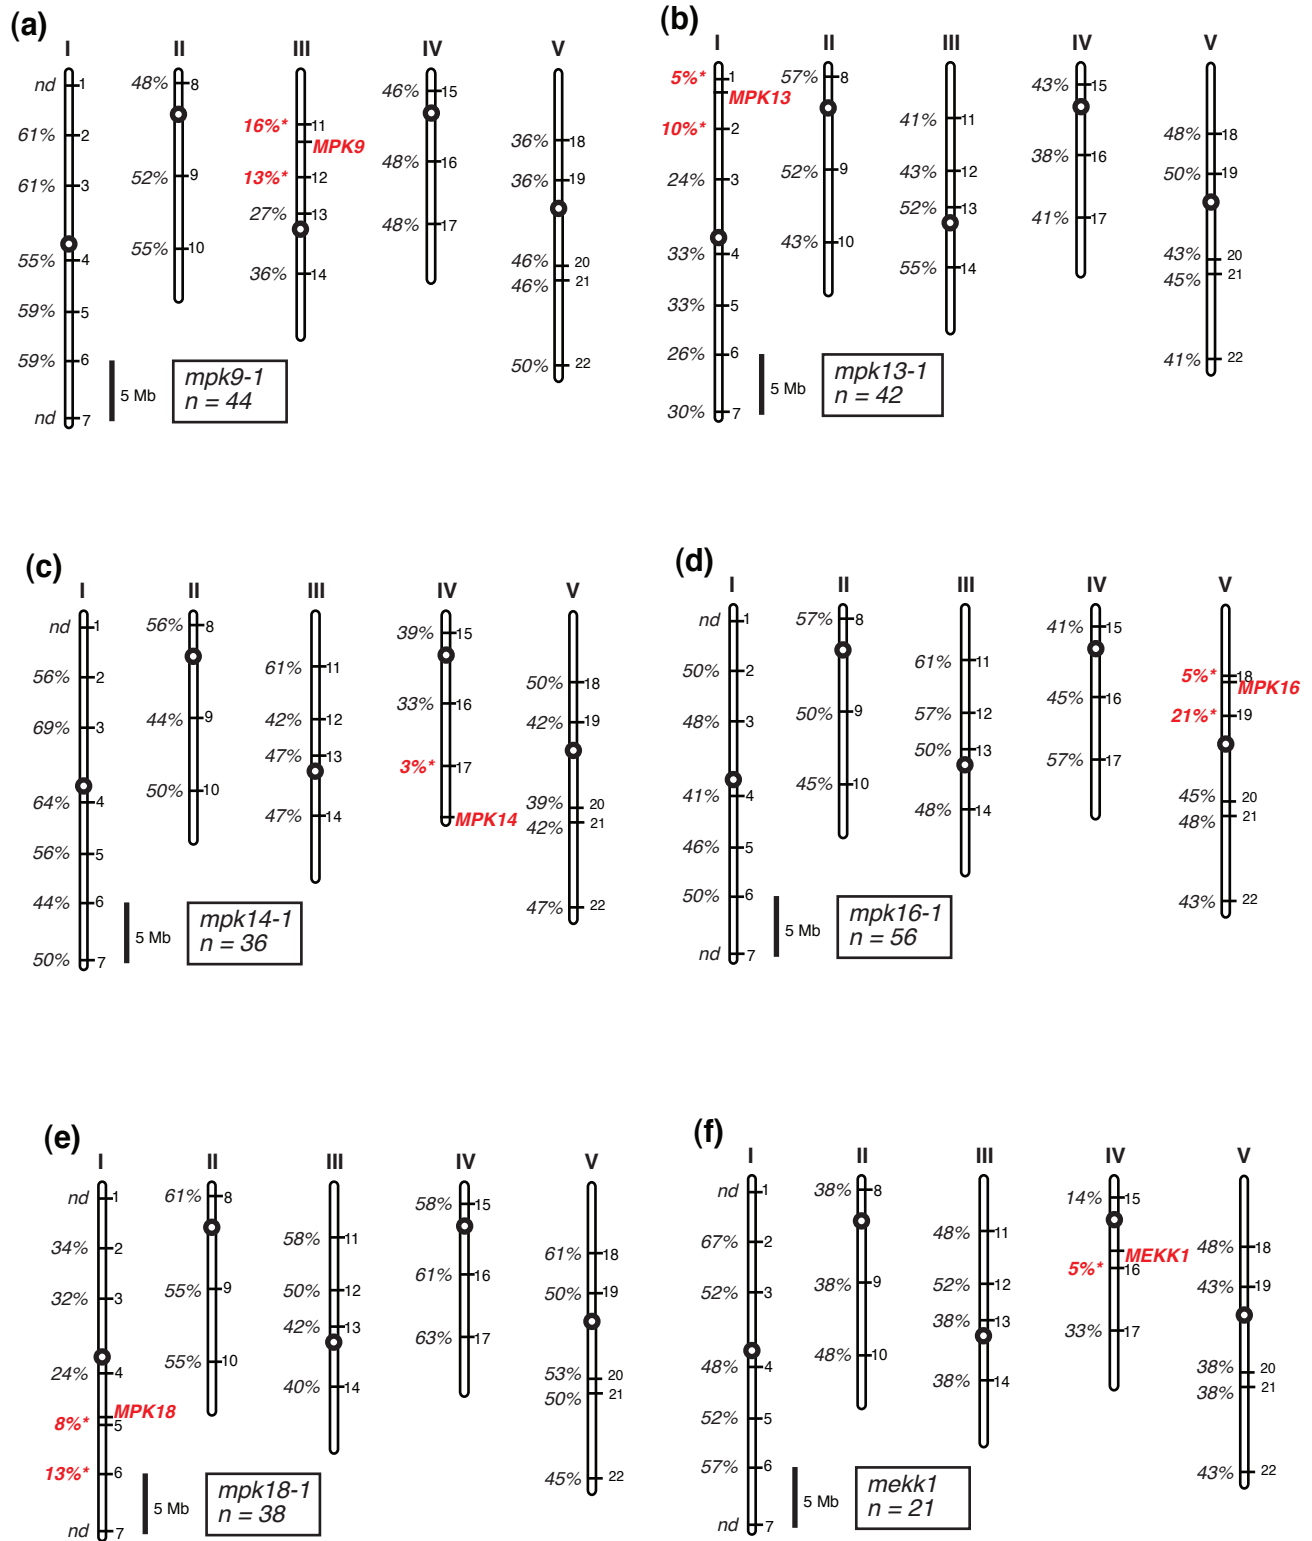

Figure S3

Supplement: NIHMS267864-supplement-Supplementary_Figure_3.pdf [file NIHMS267864-supplement-Supplementary_Figure_3.pdf]

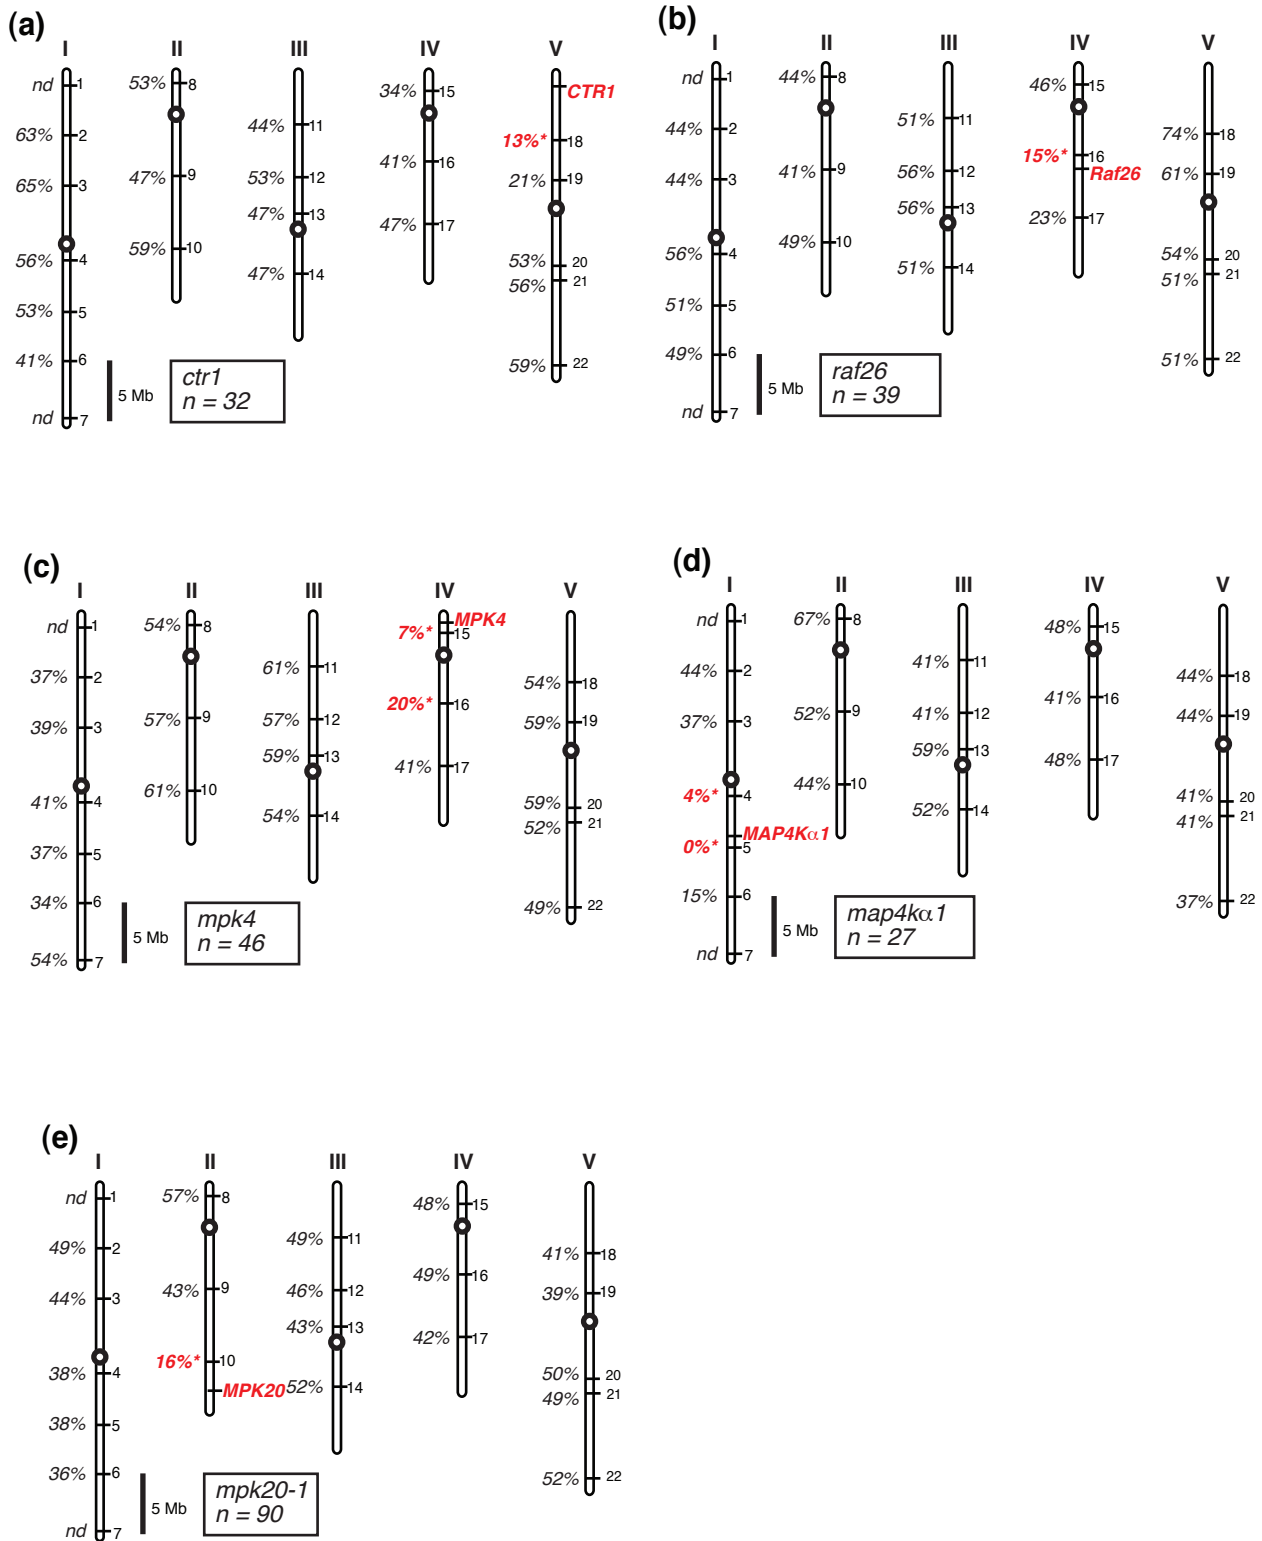

Figure S4

Supplement: NIHMS267864-supplement-Supplementary_Figure_4.pdf [file NIHMS267864-supplement-Supplementary_Figure_4.pdf]
